1 **TMEM70 is an assembly factor of mitochondrial complexes I and V**

2 Laura Sánchez-Caballero<sup>1\*</sup>, Dei M. Elurbe<sup>2\*</sup>, Fabian Baertling<sup>1,3</sup>, Sergio Guerrero-Castillo<sup>1</sup>, Mariel van den  
3 Brand<sup>1</sup>, Joeri van Strien<sup>2</sup>, Teunis J. P. van Dam<sup>4</sup>, Richard Rodenburg<sup>1</sup>, Ulrich Brandt<sup>1</sup>, Martijn A. Huynen<sup>2#</sup> and  
4 Leo G.J. Nijtmans<sup>1</sup>

5

6 <sup>1</sup>Department of Paediatrics, Radboud Centre for Mitochondrial Medicine, Radboud University Medical Centre,  
7 Nijmegen, The Netherlands

8 <sup>2</sup>Centre for Molecular and Biomolecular Informatics, Radboud Institute for Molecular Life Sciences, Radboud  
9 University Medical Centre, Nijmegen, The Netherlands

10 <sup>3</sup>Department of General Paediatrics, Neonatology and Paediatric Cardiology, University Children's Hospital  
11 Düsseldorf, Heinrich Heine University, Düsseldorf, Germany

12 <sup>4</sup>Theoretical Biology and Bioinformatics, Department of Biology, Utrecht University, Utrecht, The Netherlands

13 \* These authors contributed equally to this work

14 # Correspondence: Martijn.Huijnen@radboudumc.nl

15

16 **Abstract**

17 Protein complexes from the oxidative phosphorylation (OXPHOS) system are assembled with the help of  
18 proteins called assembly factors. We here delineate the function of the inner mitochondrial membrane protein  
19 TMEM70, in which mutations have been linked to OXPHOS deficiencies, using a combination of BioID,  
20 complexome profiling and coevolution analyses. TMEM70 interacts with complex I and V and for both  
21 complexes the loss of TMEM70 results an accumulation of an assembly intermediate followed by a reduction of  
22 the next assembly intermediate in the pathway. This indicates that TMEM70 has a role in the stability of  
23 membrane-bound subassemblies or in the membrane recruitment of subunits into the forming complex.  
24 Independent evidence for a role of TMEM70 in OXPHOS assembly comes from evolutionary analyses. The  
25 TMEM70/TMEM186/TMEM223 protein family, of which we show that TMEM186 and TMEM223 are  
26 mitochondrial in human as well, only occurs in species with OXPHOS complexes. Our results validate the use of  
27 combining complexomics with BioID and evolutionary analyses in elucidating congenital defects in protein  
28 complex assembly.

29

30 **Introduction**

31 The oxidative phosphorylation (OXPHOS) system, situated in the mitochondrial inner membrane, is composed  
32 of five enzyme complexes (I–V) and two electron carriers, coenzyme Q and cytochrome *c*<sup>1</sup>. The first four  
33 complexes form the electron transport chain (ETC) that couples the transfer of electrons from NADH and  
34 Succinate to oxygen, to the transfer of protons across the membrane. The thus generated proton gradient is used  
35 by complex V (CV) or ATP synthase to generate adenosine triphosphate (ATP)<sup>2</sup>. From the five enzymes of the  
36 OXPHOS system, the first and the last, i.e., complex I (CI) or NADH:ubiquinone oxidoreductase and CV are  
37 particularly relevant to this study. Mammalian CI is a 45 subunit L-shaped complex, seven subunits of which are  
38 mitochondrially encoded, (MT-ND1, MT-ND2, MT-ND3, MT-ND4, MT-ND4L, MT-ND5 and MT-ND6) with a  
39 lipophilic arm integrated into the inner mitochondrial membrane and a hydrophilic peripheral arm jutting out into  
40 the mitochondrial matrix<sup>3</sup>. The enzyme can be subdivided into three different functional modules<sup>4</sup> that are  
41 assembled separately<sup>5,6</sup>: the P-module (proton translocation) that represents the lipophilic membrane arm, the N-  
42 module (NADH dehydrogenase) and the Q-module (coenzyme Q reduction). Mammalian CV is an enzyme  
43 complex composed of 18 subunits (including the regulatory protein IF<sub>1</sub>), two of which are mitochondrially  
44 encoded (MT-ATP6 and MT-ATP8)<sup>7</sup>. It comprises two modules: the globular F<sub>1</sub> domain (subunits  $\alpha$ ,  $\beta$ ,  $\gamma$ ,  $\delta$  and  
45  $\epsilon$ ) that contains the catalytic region, and the membrane-embedded F<sub>0</sub> domain, that contains the rotary motor. The  
46 F<sub>1</sub> module is connected to F<sub>0</sub> (subunits DAPIT, 6.8PL, a, A6L, e, f, g and c) by two stalks, one central, with  
47 subunits  $\gamma$ ,  $\delta$ ,  $\epsilon$  and one peripheral that consists of the oligomycin sensitivity conferral protein (OSCP) and  
48 subunits b, d, and F<sub>6</sub>. The central stalk and the c-subunits octamer establish the rotor of the fully assembled  
49 enzyme<sup>8</sup>.

50 For the optimal assembly of the OXPHOS complexes extra proteins are needed: the so-called assembly factors,  
51 which assist in the assembly of a complex but are not part of the final complex. Assembly factors have been  
52 discovered by genetic and experimental approaches, often in combination with bioinformatic analyses<sup>9</sup>. Those  
53 analyses have exploited that the assembly factors are often part of large protein families<sup>10</sup>. They show  
54 conservation of molecular function and co-evolve with CI itself<sup>11</sup>. This is e.g. the case for the CI assembly factor  
55 IND1, that was predicted to play a role in the assembly of Fe-S clusters in CI via the role of its cytoplasmic  
56 homologs in the assembly of other Fe-S proteins and via its co-evolution with CI proteins<sup>12</sup>. However, the exact  
57 molecular function of many assembly factors has not been elucidated.

58 From all the complexes that are part of the OXPHOS system, the one with the lowest number of known  
59 assembly factors is CV. Its known assembly factors are ATPAF1 and ATPAF2<sup>13</sup>, which both interact with the F<sub>1</sub>  
60 module, and TMEM70<sup>14</sup>. TMEM70 is a transmembrane protein that localizes in the inner membrane of the

61 mitochondria<sup>15,16</sup>. It contains two transmembrane regions that form a hairpin structure of which the N- and C-  
62 termini are located in the mitochondrial matrix<sup>17</sup>. Mutations in *TMEM70* have been reported to severely diminish  
63 the content of CV in a large cohort of patients<sup>14,18-26</sup>, and of all nuclear encoded proteins affecting CV, *TMEM70*  
64 is the most commonly mutated in disease<sup>27</sup>. This observation led to the hypothesis that *TMEM70* is a CV  
65 assembly factor. However, there is no evidence of its direct interaction with CV proteins, and its specific role in  
66 CV assembly remains unclear<sup>16,26</sup>.

67 Interestingly, defects in *TMEM70* have not exclusively reported deleterious effects on CV but also that  
68 combined with less severe CI deficiency<sup>22</sup>, a combined OXPHOS deficiency<sup>28</sup> or even an isolated CI  
69 deficiency<sup>20</sup>. Furthermore, *TMEM70* has been shown to co-migrate with an assembly intermediate that forms  
70 part of *CI*<sup>6</sup>, suggesting it might form part of its assembly process.

71 The present study aims to elucidate the full role of *TMEM70* in the OXPHOS system using standard biochemical  
72 techniques combined with two novel techniques: complexome profiling and the BioID proximity-dependent  
73 labelling assay, together with an in-silico approach to detect *TMEM70* homologs and reconstruct the co-  
74 evolution of *TMEM70* with other mitochondrial proteins.

75

## 76 **Results**

77

### 78 **BirA\* tagged *TMEM70* biotinylates complex I, complex V and the small subunit of the ribosome**

79 To study whether there is a direct interaction of *TMEM70* with components of CI and CV and thus link its  
80 absence to both OXPHOS deficiencies, or whether it interacts with any other mitochondrial protein complex, we  
81 used HEK293 Flp-In T-Rex293 cell lines engineered to express BirA\*- tagged *TMEM70* in a doxycycline-  
82 inducible manner (BioID). In this experiment, designed to biotinylate proteins that occur in close proximity to  
83 our protein of interest, we detected 538 proteins (Supplementary Table S1). From those, we obtained a list of 135  
84 putative interaction partners of *TMEM70* based on proteins showing a significant increase in biotin positive –  
85 doxycycline positive conditions compared to biotin positive – doxycycline negative conditions and biotin  
86 negative – doxycycline positive conditions (Supplementary Fig. S1, Supplementary Table S2). The  
87 mitochondrial proteins biotinylated by BirA\*-*TMEM70* (n = 102) were significantly enriched for proteins  
88 involved in CI – including assembly factors *NDUFAF1*, *NDUFAF2*, *NDUFAF4* and *NDUFAF5* – and CV, as  
89 well as the small subunit of the mitochondrial ribosome (analysis done with DAVID<sup>29</sup>, Table 1, Supplementary  
90 Table S3).

91

| Category         | Term                                                   | GO         | Cluster | FDR      |
|------------------|--------------------------------------------------------|------------|---------|----------|
| GOTERM_BP_DIRECT | mitochondrial respiratory chain complex I assembly     | GO:0032981 | 1       | 6.53e-11 |
| GOTERM_BP_DIRECT | mitochondrial electron transport, NADH to ubiquinone   | GO:0006120 | 1       | 4.73e-6  |
| GOTERM_CC_DIRECT | mitochondrial respiratory chain complex I              | GO:0005747 | 1       | 8.03e-5  |
| GOTERM_MF_DIRECT | NADH dehydrogenase (ubiquinone) activity               | GO:0008137 | 1       | 9.56e-5  |
| GOTERM_BP_DIRECT | mitochondrial translational elongation                 | GO:0070125 | 2       | 4.02e-4  |
| GOTERM_CC_DIRECT | Mitochondrial small ribosomal subunit                  | GO:0005763 | 2       | 1.15e-3  |
| GOTERM_BP_DIRECT | Mitochondrial translation termination                  | GO:0070126 | 2       | 6.17e-3  |
| GOTERM_CC_DIRECT | Mitochondrial proton-transporting ATP synthase complex | GO:0005753 | 3       | 1.85e-2  |
| GOTERM_CC_DIRECT | Mitochondrial ATP synthesis coupled proton transport   | GO:0042776 | 3       | 2.60e-2  |

92

93 Table 1. Enriched clusters obtained from potential mitochondrial interactors of TMEM70

94

95

96 **A comprehensive assessment of the *TMEM70* knockout effect on the OXPHOS system**

97 An interaction of *TMEM70* with CI and CV, as we observed in the BioID results, might explain why patients  
98 harbouring *TMEM70* mutations have CI and CV deficiencies<sup>20,22,28</sup>. To obtain a detailed view on how the  
99 absence of *TMEM70* affects those mitochondrial protein complexes, we performed complexome profiling on a  
100 *TMEM70* knockout cell line and on controls. We compared two HAP1 wild-type cell lines with one mutant cell  
101 line that had a 32bp deletion in exon 1 of the *TMEM70* gene, and performed a biological replicate by again  
102 enriching mitochondria from these cell lines and repeating the complexome profiling. The deletion in exon 1 of  
103 *TMEM70* causes a frameshift and a premature stop codon in the cDNA, with no detectable presence of the  
104 protein by MS/MS (Table 2). Complexome profiling, which consists of a BN-PAGE followed by mass  
105 spectrometry, allows us to see the majority of the proteins belonging to each of the native complexes and their  
106 distribution over the various assembly intermediates<sup>30,31</sup>. In the six complexome profiles, four controls and two  
107 *TMEM70* knockouts, we detected in total 3766 proteins, of which 814 are annotated as mitochondrial in  
108 MitoCarta 2.0<sup>32</sup>. The profiles were normalized such that the sum of the intensities of the mitochondrial proteins

109 between the samples were equal, and the profiles were aligned with COPAL<sup>33</sup> to allow comparison between the  
 110 replicates (see Supplementary Table S4 for the complete results).  
 111 In order to assess the overall effects caused by the lack of TMEM70 on OXPHOS, and to confirm its interactions  
 112 with complexes I and V suggested by our BioID results (Table 1) as well as by previous studies<sup>6,22</sup>, we measured  
 113 the presence of the subunits belonging to the fully formed OXPHOS complexes (see Methods). We observed a  
 114 significant decrease in the abundance of the subunits belonging to CI and CV and small, non-significant  
 115 increases in the other three OXPHOS complexes (Fig. 1a; *p* values: CI – 1.4e-12 (median ~60% compared to  
 116 controls), CII – 0.125, CIII – 0.322, CIV – 0.204, CV – 1.5e-5 (median ~30% compared to controls), Wilcoxon  
 117 signed-rank test, Supplementary Fig. S2). We also tested their enzymatic activities by spectrophotometric  
 118 analysis and, accordingly, results showed a 30% decrease in CI activity (*p* = 0.156) and a 70% decrease and CV  
 119 activity (*p* = 0.009), Fig. 1b), whereas the other OXPHOS complexes showed no apparent change in activity.  
 120 Furthermore, we also observed a reduction in fully formed complexes I and V in BN-PAGE/immunoblotting  
 121 analysis in KO conditions compared to controls (Supplementary Fig. S3).

#### By MS/MS

| Sequence               | P1_1 | P1_2 | P631_1 | P631_2 | KO_1 | KO_2 |
|------------------------|------|------|--------|--------|------|------|
| AITYNAMIAETSTVHFHQNDVK | 10   | 10   | 17     | 8      | 0    | 0    |
| HVFTTFYAK              | 18   | 2    | 20     | 2      | 0    | 0    |
| IYTGNMAR               | 19   | 5    | 19     | 1      | 0    | 0    |
| IYHEATTDYK             | 22   | 5    | 16     | 0      | 0    | 0    |
| SIIVNPVIFPNR           | 10   | 4    | 12     | 4      | 0    | 0    |
| Total                  | 79   | 26   | 84     | 15     | 0    | 0    |

#### By matching

| Sequence               | P1_1 | P1_2 | P631_1 | P631_2 | KO_1 | KO_2 |
|------------------------|------|------|--------|--------|------|------|
| AITYNAMIAETSTVHFHQNDVK | 34   | 7    | 35     | 2      | 0    | 0    |
| HVFTTFYAK              | 8    | 21   | 10     | 13     | 0    | 0    |
| IYTGNMAR               | 29   | 40   | 41     | 21     | 1    | 1    |
| IYHEATTDYK             | 13   | 22   | 40     | 21     | 0    | 2    |
| SIIVNPVIFPNR           | 8    | 12   | 23     | 4      | 2    | 0    |
| Total                  | 93   | 102  | 149    | 61     | 3    | 3    |

122 Table 2. Peptides assigned to TMEM70 obtained in all 6 samples by MS/MS and by matching  
123  
124

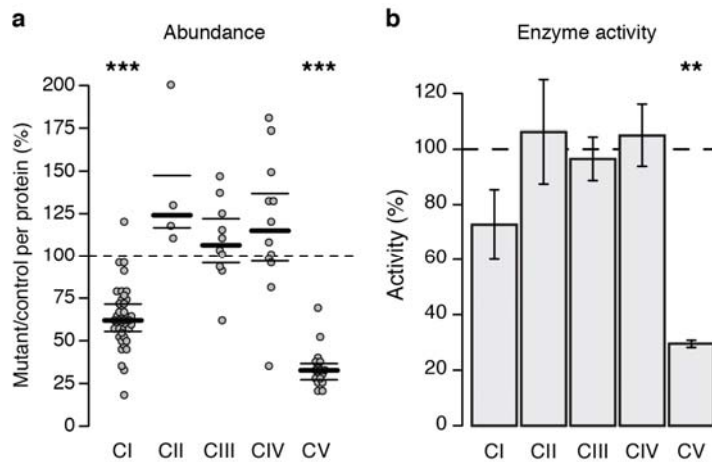

125  
126 Figure 1. Lack of TMEM70 has an effect in CI and CV. **a** Ratios between mutants and controls measured per  
127 subunit and grouped by complex. CI and CV show an apparent reduction of ~40% and 70% respectively. **b**  
128 Enzymatic activities shown by TMEM70 KO with respect to the parental control cell line. Complexes I and V  
129 show a decrease, although statistically significant only for the latter ( $p = 0.156, 0.8, 0.51, 0.577$  and  $0.009$ , for  
130 complexes I, II, III, IV and V, respectively;  $n = 3$ ). Error bars represent the standard deviation.

131

### 132 Impaired assembly of complex I

133 We first focused on the differences in the assembly process of CI between the *TMEM70* wild-type and in  
134 *TMEM70* knockout HAP1 cells. As mentioned above, there was a reduction of fully formed CI in cells lacking  
135 TMEM70 (Fig. 1a), suggesting a possible CI assembly defect. CI assembly proceeds via pre-assembled  
136 intermediates that later on interact, until the fully formed and active enzyme is made<sup>5</sup>. When analysing the  
137 assembly steps of CI under *TMEM70* KO conditions in the complexomics results, we observed a clear and  
138 significant accumulation of the Q/P<sub>p</sub>-a intermediate (Fig. 2 and Supplementary Fig. S4; median ratio = 4.14;  $p =$   
139  $4.89 \times 10^{-4}$ ) relative to controls, consistent with the accumulation observed in two-dimensional BN-PAGE/SDS-  
140 PAGE for NDUFS3 intermediates (Supplementary Fig. S5). At this stage, the Q-module formed by NDUFS2,  
141 NDUFS3, NDUFS7, NDUFS8 and NDUF5 and the assembly factors NDUF3 and NDUF4 is anchored  
142 to the membrane with proteins belonging to the proximal P-module, TIMMDC1 and MT-ND1<sup>6</sup>. Following the  
143 formation of this intermediate, and based on one of the previously described assembly pathways of complex I

144 (Fig. 2), the remaining subunits of the proximal module ( $P_P$ -b), which do not show any significant changes while  
145 forming part of this intermediate (Fig. 2 and Supplementary Fig. S4; median ratio = 0.94;  $p = 0.102$ ), are added  
146 to form the intermediate  $Q/P_P$  that, in the TMEM70 depleted cells, also accumulates relative to the controls (Fig.  
147 2 and Supplementary Fig. S4; median ratio = 2.41;  $p = 2.6e-3$ ). The most distal part of the enzyme, the  $P_D$   
148 intermediate, is composed of two different intermediates:  $P_D$ -a and  $P_D$ -b. TMEM70 has been observed to co-  
149 migrate with this distal membrane part ( $P_D$ ) of complex I, and within this distal part, with the intermediate  $P_D$ -a,  
150 that is just next to the proximal membrane part of the complex<sup>6</sup>. With respect to the  $P_D$  part of the enzyme, the  
151 intermediate  $P_D$ -b showed a minor but significant accumulation (Fig. 2 and Supplementary Fig. S4; median ratio  
152 = 2.18;  $p = 0.016$ ), while no accumulation was observed for  $P_D$ -a (median ratio = 1.04;  $p = 0.383$ ). These results  
153 are as well compatible with the alternative assembly pathway of complex I (Supplementary Fig. S6), which also  
154 shows a significant decrease of the intermediates that follow after the incorporation of  $P_D$ -a ( $P_P$ -b/ $P_D$ -a,  
155 Supplementary Fig. S6 and Supplementary Fig. S4; median ratio = 0.64;  $p = 0.004$ ). Finally, both assembly  
156 pathways converge with the formation of intermediate  $Q/P$ , which is also reduced in the absence of TMEM70  
157 (Fig. 2, Supplementary Fig. S6 and Supplementary Fig. S4; median ratio = 0.70;  $p = 1.9e-7$ ).

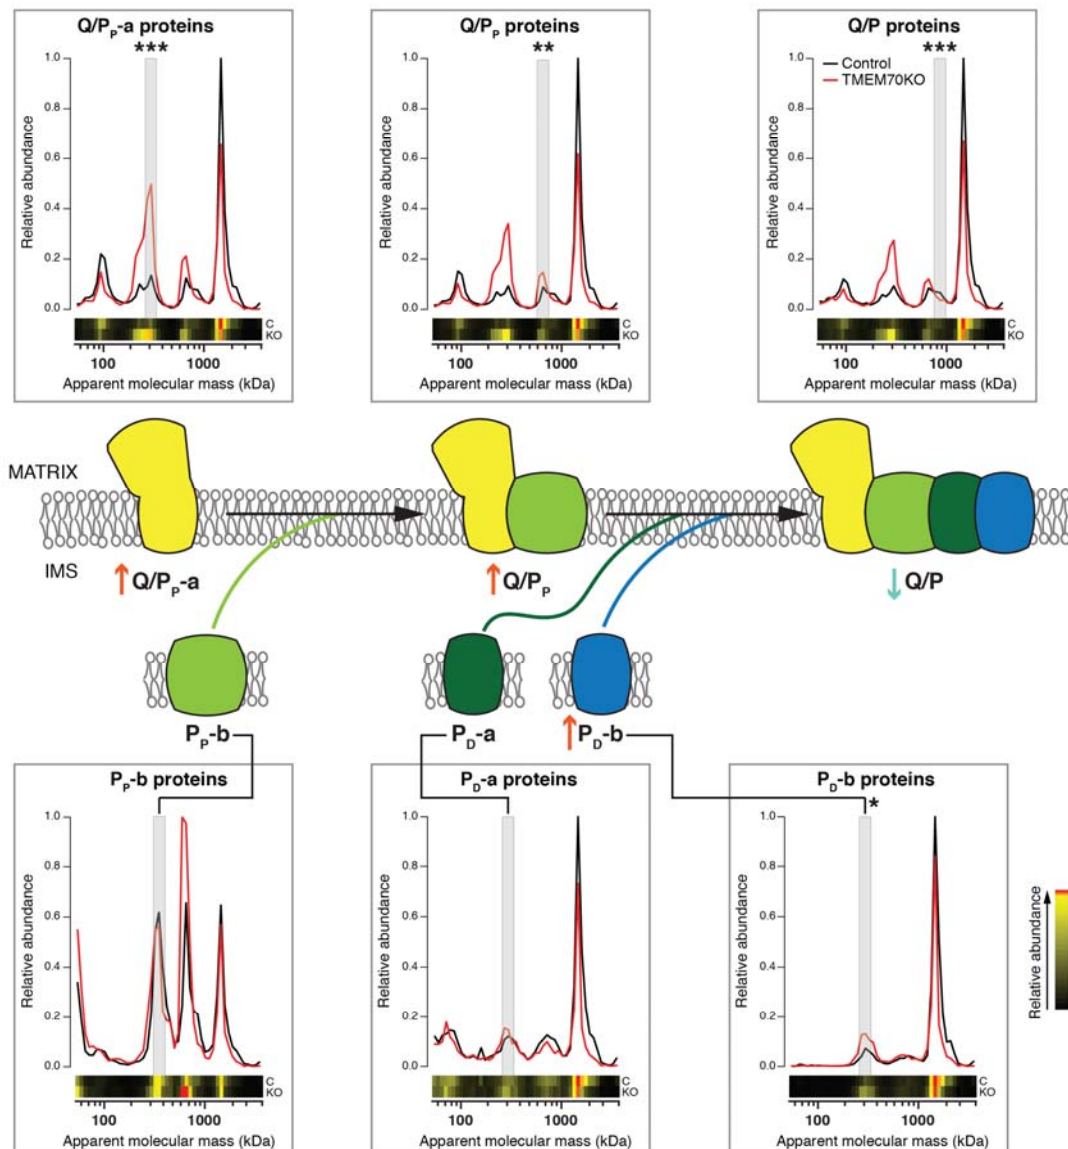

158

159 Figure 2. The assembly of complex I is impaired in the absence of TMEM70. Individual plots depict migration  
 160 profiles of the average of the iBAQ values of the proteins that belong to the stated assembly intermediate (see  
 161 Methods) in parental HAP1 cells (black line) and TMEM70 KO HAP1 cells (red line). The significant  
 162 accumulation (red arrow) shown by intermediates Q/P<sub>p</sub> and P<sub>D-b</sub> together with the significant depletion (blue  
 163 arrow) of the subsequent product (Q/P) in the TMEM70 knockout cells suggests an impairment in the  
 164 incorporation of the first two to form the latter. \*\*\*  $p < 0.001$ . \*\*  $p < 0.01$ . \*  $p < 0.05$  based on results depicted  
 165 in Supplementary Figure S4

166

167



168

169 **Loss of the interaction between the c-ring and F<sub>1</sub> module in the *TMEM70* knockout**

170 In order to understand the observed decrease in assembled CV in the absence of *TMEM70*, we also examined its  
171 assembly process in the complexomics data (Supplementary Table S4). We could identify all subunits of CV  
172 with two exceptions: the subunit  $\epsilon$  (in all samples) and the components of the c-ring octamer (C1 subunits) (in  
173 the replicate experiment of the *TMEM70* KO cell line). Based on these data, the subunits of CV were distributed  
174 over multiple intermediates in the control: the F<sub>1</sub> soluble and F<sub>1</sub> anchored intermediates, with subunits  $\alpha$ ,  $\beta$ ,  $\gamma$  and  
175  $\delta$  in the former, and those plus C1 in the latter (Supplementary Fig. S7a), the F<sub>O</sub> late assembly intermediate with  
176 subunits ATP8, ATP6, DAPIT, 6.8PL, d, F6 and OSCP (Supplementary Fig. S7b) and the F<sub>O</sub> early assembly  
177 intermediate with subunits b, e, f and g (Supplementary Fig. S7c) as well as the fully formed complex V.  
178 Subunits belonging to F<sub>1</sub> show a migration pattern matching previously suggested states<sup>34</sup>, namely, F<sub>1</sub> soluble  
179 ( $\alpha$ - $\beta$  hexamer together with  $\gamma$ ,  $\delta$  and  $\epsilon$  monomers), F<sub>1</sub> attached to the membrane bound c-ring, and F<sub>1</sub> forming  
180 part of the fully assembled complex (Fig. 3a Control, Fig. 3b). With respect to the F<sub>O</sub> module, our results show a  
181 co-migration pattern that hints towards the formation of two intermediates before the fully assembled complex:  
182 one formed in an early stage composed of subunits b, e, f and g and one containing these subunits plus the ATP8,  
183 ATP6, DAPIT, 6.8PL, d, F6 and OSCP subunits (Supplementary Fig. S7).

184 When we explored the assembly of CV in the *TMEM70* knockout cell line in detail, we found that the above-  
185 mentioned association of the C1 subunit octamer with the  $\alpha$ - $\beta$  hexamer and the  $\gamma$ ,  $\delta$  and  $\epsilon$  subunits that form the  
186 F<sub>1</sub> module was missing in the absence of *TMEM70* (median ratio = 0.04, the small number of subunits does not  
187 allow obtaining significant values using non-parametric statistics). Interestingly, the canonical soluble F<sub>1</sub>  
188 intermediate showed a slight accumulation compared to the control (median ratio = 1.27) (Fig. 3a). Consistently,  
189 this intermediate was found to be absent in the one-dimensional BN-PAGE immunoblot (Supplementary Fig.  
190 S8). With respect to the c-ring components in the complexome analysis by mass spectrometry, we reasoned that  
191 the tryptic in-gel digestion may not generate enough detectable peptides of proteins that are small and highly  
192 hydrophobic, such as the C1 subunit. To address this issue, we repeated the complexome profiling, but now  
193 digesting the samples with chymotrypsin instead of trypsin (Supplementary Table S5). Results revealed that the  
194 intermediate in the wild type with an apparent mass of ~420 kDa indeed represents the F<sub>1</sub> module associated  
195 with the C1 subunit octamer (Fig. 4). Furthermore, the absence of this intermediate in *TMEM70* devoid cells  
196 was accompanied by the absence of C1 subunit at the same apparent mass, thus confirming the interaction of the  
197 soluble F<sub>1</sub> with the membrane subunit C1 (Fig. 4).

198 When focusing on the subunits belonging to the  $F_0$  early assembly intermediate and/or the  $F_0$  late assembly  
 199 intermediate, we observed that the differences between the *TMEM70* knockout and the control are based on an  
 200 overall reduction (Fig. 3a). Together, these results suggest a role of *TMEM70* in the membrane stability of the  
 201  $C1$  subunit octamer or its interaction with the  $F_1$  module.

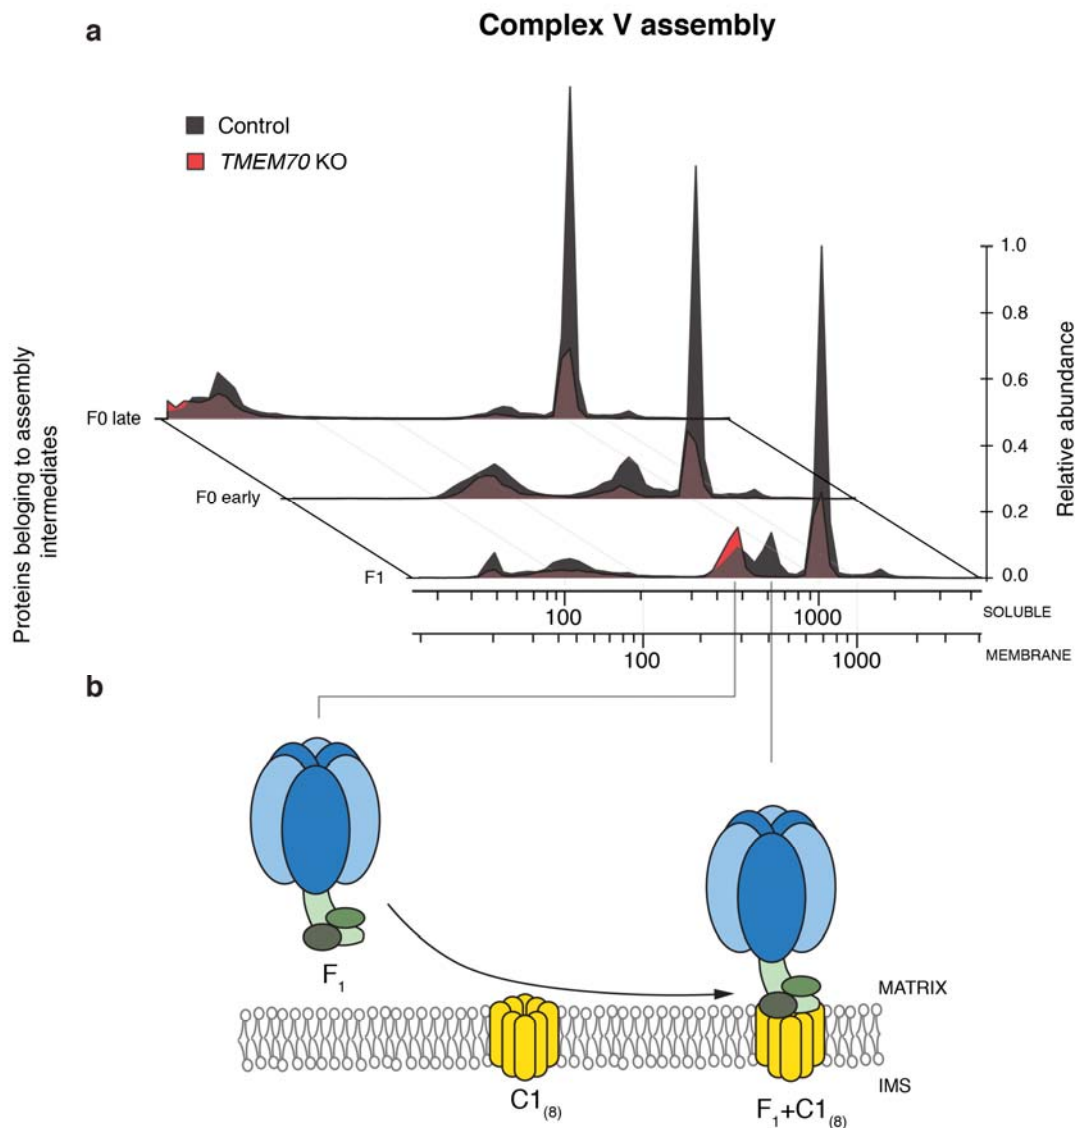

202  
 203 Figure 3. The assembly of complex V misses a  $F_1$  intermediate in the absence of *TMEM70*. **a** Migration profiles  
 204 of complex V intermediates in control HAP1 cells (dark grey) and *TMEM70* KO HAP1 cells (red).  
 205 Intermediates are represented in the z-axis by the average of the iBAQ values of all the subunits detected by  
 206 mass spectrometry that belong to that intermediate. In absence of *TMEM70*,  $F_1$  intermediate accumulation is  
 207 followed by  $F_1$ -c intermediate depletion whereas the other intermediates do not show specific effects besides an

208 overall reduction of their presence. **b** The  $F_1$  soluble intermediate is anchored to the inner mitochondrial  
209 membrane binding the c-ring octamer  
210

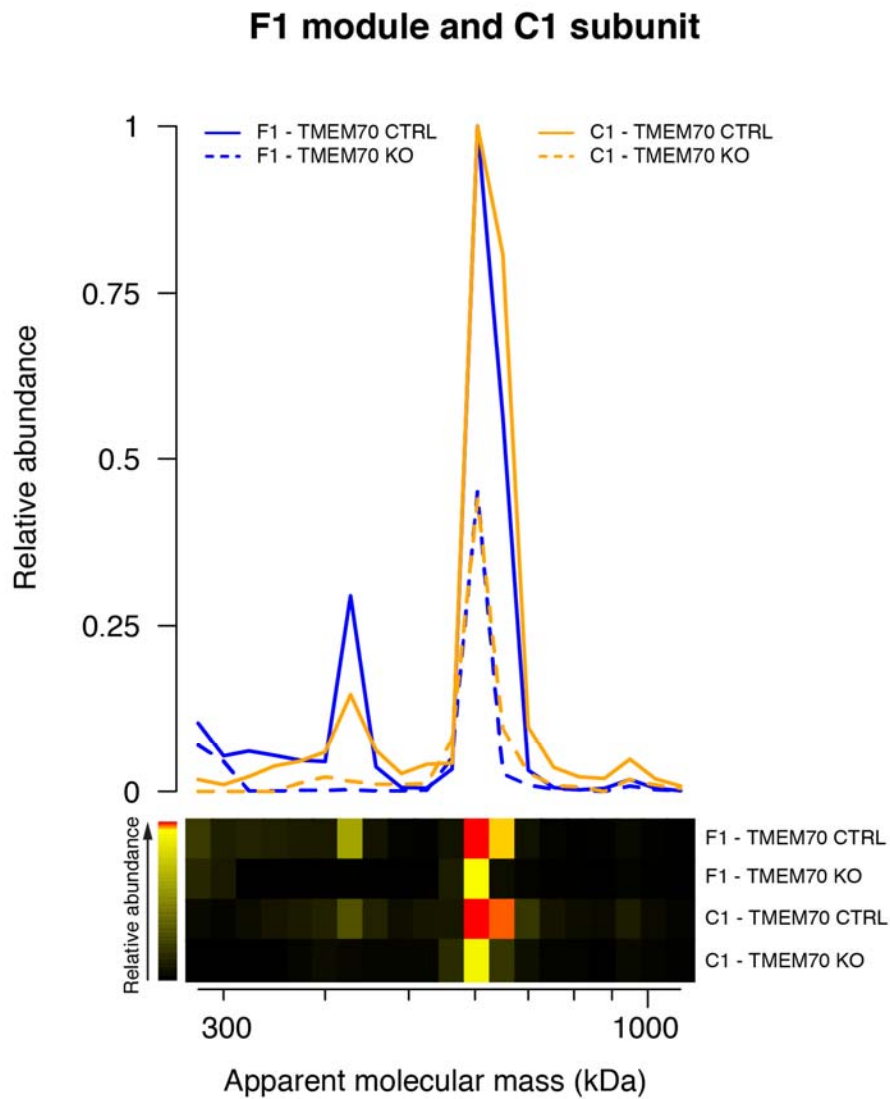

211  
212 Figure 4. ATP synthase  $F_0$  complex subunit C1 interaction with  $F_1$  is missing in the absence of TMEM70.  
213 Complexome profiling results after chymotrypsin digestion showing the average of detected  $F_1$  subunits and C1  
214 protein in control and TMEM70 KO HAP1 cells show a missing intermediate in the latter formed by both groups  
215 of proteins ( $F_1$  proteins and an octamer of C1 subunits).  
216  
217

218

219 **Mitochondrial translation is not disturbed by the lack of TMEM70**

220 After confirming the involvement of TMEM70 in complex I and V that was indicated by the BioID results  
221 (Table 1), we proceeded with the third complex from the BioID analysis, the mitochondrial ribosome, to  
222 determine the possible effect of TMEM70 depletion on the assembly of the small subunit of the mitochondrial  
223 ribosomes and/or in mitochondrial translation. To do so, we first assessed the assembly of the small subunit of  
224 the mitochondrial ribosomes with our complexomics data in both the presence and absence of TMEM70  
225 (Supplementary Table S4). We did not observe any discrepancies in the formation of intermediates throughout  
226 the assembly of the mitochondrial ribosome when comparing both conditions (Fig. 5a), except for a slight but  
227 significant increase of the final product ( $p = 7.5e-3$ , Supplementary Fig. S9) in the absence of TMEM70. In order  
228 to assess whether such a difference would affect mitochondrial translation, we labelled newly translated  
229 mitochondrial products with  $^{35}\text{S}$ -methionine $^{35}$  comparing newly synthesized products between control and  
230 *TMEM70* KO conditions. We collected cells 5 minutes, 15 minutes, 30 minutes and 60 minutes after 1h of  
231 permanently inhibiting cytoplasmic translation (Fig. 5b). Results showed no differences between the two  
232 conditions affecting the mitochondrially translated proteins of complexes III and IV. However, we did observe a  
233 reduction in ATP6 that becomes more pronounced over time, which is consistent with the strong reduction in  
234 fully assembled CV.  
235 The lack of differences in both the assembly process of the ribosomes and the translation efficiency of those  
236 suggest no significant role of TMEM70 in their assembly or their normal functioning.

**a**  
**Mitochondrial ribosome: small subunit**

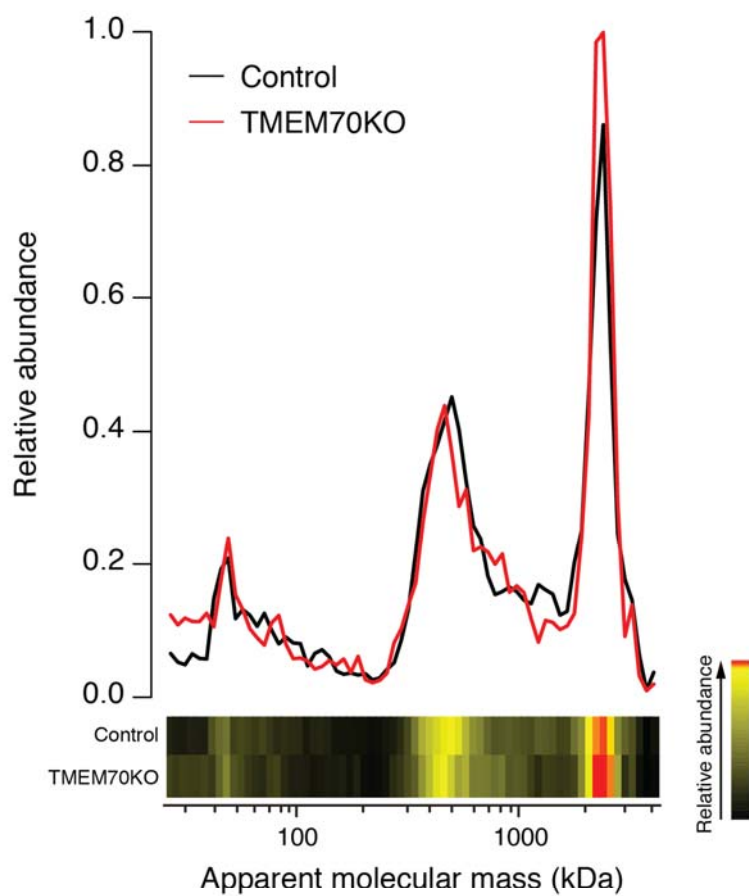

**b**

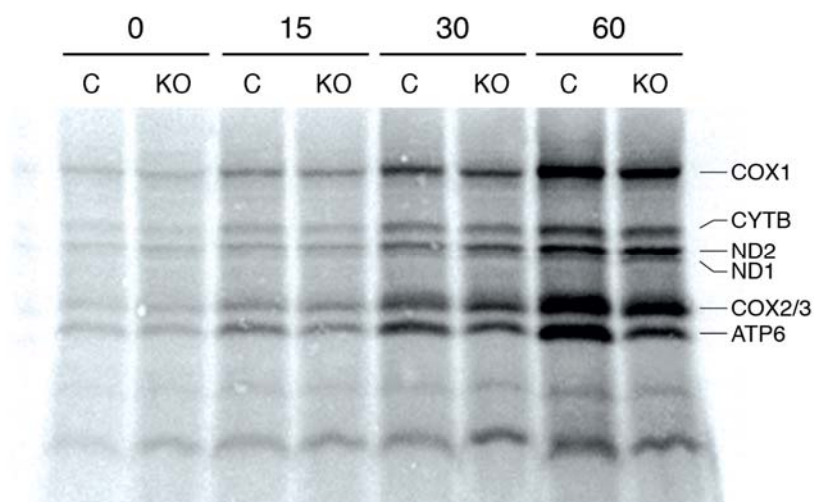

238 Figure 5. The assembly of the small subunit of the mitochondrial ribosome and the translation of mitochondrial  
239 proteins are not affected in the absence of TMEM70 even though there is an increase of the final product. **a**  
240 Complexome profile of proteins belonging to the small subunit of the mitochondrial ribosome. Despite being  
241 enriched in the BioID dataset, its assembly does not appear to be disturbed in the absence of TMEM70. **b** Pulse  
242 labelling of mitochondrial encoded products after 5 min, 15 min, 30 min and 1 h. Newly synthesised products do  
243 not seem to show any differences in abundance, with the exception of ATP6 after 15 or more minutes.

244

#### 245 **The mitochondrial protein family TMEM223/TMEM186/TMEM70 co-evolves with OXPHOS**

246 In order to examine whether TMEM70 has co-evolved with OXPHOS proteins we determined its phylogenetic  
247 distribution. Sequence searches for TMEM70 using sensitive Hidden Markov Models (Methods) revealed that it  
248 has two paralogs in human: TMEM223 ( $E=2.9e-8$ ) and TMEM186 ( $E=1.2e-28$ ) (Fig. 6a). Results obtained from  
249 cellular fractionation (Fig. 6b) and microscopy (Fig. 6c and 6d) indicate a mitochondrial localization of both  
250 paralogs. Although the level of sequence identity between the three family members is low (e.g. in human  
251 TMEM70-TMEM186: 14%, TMEM70-TMEM223: 9%, TMEM186-TMEM223: 15%), *in silico* predictions  
252 indicate a similar asymmetric hairpin topology for all three proteins; a short N-terminal sequence located in the  
253 mitochondrial matrix followed by an in/out and an out/in transmembrane helix and a longer C-terminal sequence  
254 (Supplementary Fig. S10), consistent with the experimental results for TMEM70<sup>17</sup>. Furthermore, also the  
255 *Saccharomyces cerevisiae* protein Mrx15, that is homologous to the TMEM70/186/223 family and within this  
256 family most similar to TMEM223 ( $E=8e-28$ , 10% identity), has this asymmetric hairpin topology<sup>36</sup>. All three  
257 members of the TMEM70/186/223 family are phylogenetically widespread (Fig. 6a), and appear to have been  
258 present in the last eukaryotic common ancestor (LECA). We then asked whether any other mitochondrial  
259 proteins have a similar phylogenetic distribution as members of the TMEM70/186/223 family. Given the low  
260 sequence identity between orthologs in this protein family and between their potential interactors, we used a two-  
261 tier approach. First, we employed an in-house orthology database based on pairwise sequence comparisons and  
262 containing 52 diverse eukaryotic species to derive phylogenetic profiles of the human proteome, using  
263 differential Dollo parsimony that measures the number of independent loss events along an evolutionary tree as  
264 an evolutionary distance measure. For TMEM70, the protein with the highest co-evolution signal (NDUFAF1)  
265 and four of the ten most co-evolving proteins were CI proteins (Supplementary Table S6). Second, we manually  
266 analysed, using the top hits of the first approach and using more sensitive, profile-based analyses (Methods), the  
267 co-evolution of TMEM70/186/223 with CI, CV and TMEM14. The latter is, based on the first step of the

268 analysis, a protein family that co-evolves with TMEM70/186/223, and is also located in the inner mitochondrial  
 269 membrane. Overall, we observe that members of the TMEM70/186/223 protein family only occur in species  
 270 with OXPHOS, and are absent from species without CI and or CV. Nevertheless, the reverse does not apply as  
 271 there are taxa, like the Kinetoplastida, that do have CI and CV but do not have detectable homologs of the  
 272 TMEM70/186/223 family (Supplementary Table S7).

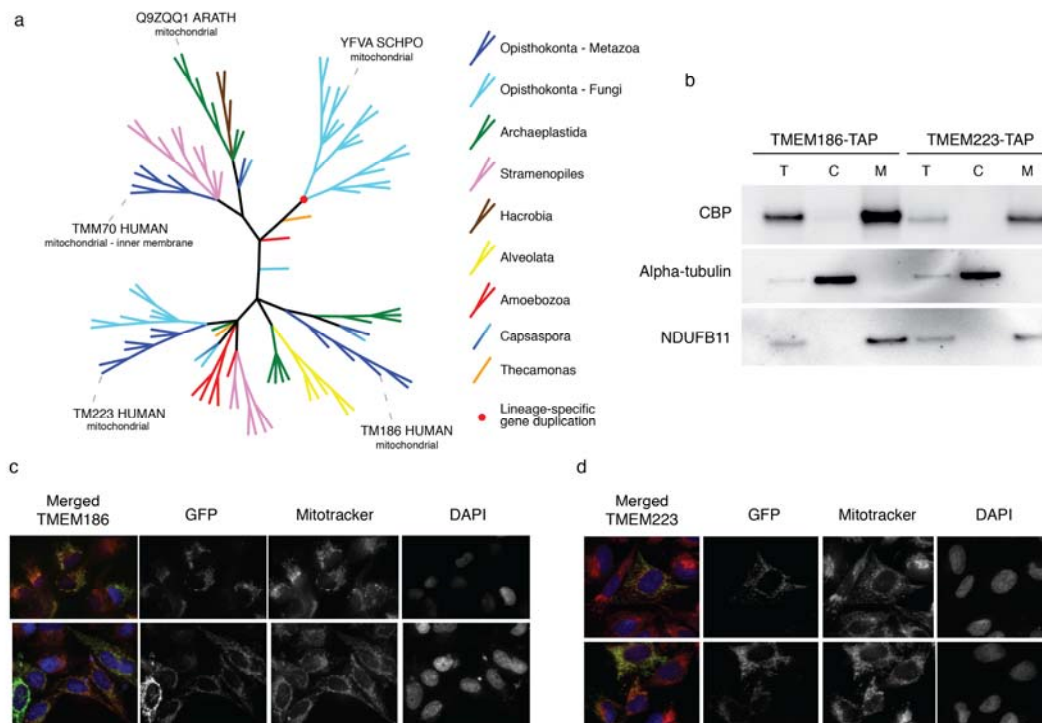

273  
 274 Figure 6. TMEM70 has two paralogs, TMEM186 and TMEM223 that are both located in the mitochondria.  
 275 Furthermore, for TMEM70 orthologs in *Arabidopsis thaliana* and *Schizosaccharomyces pombe*, there is  
 276 experimental evidence that localizes them in the mitochondria<sup>58,59</sup>, while also a *S. cerevisiae* homolog of the  
 277 family, YNR040W/Mrx15 that due to extreme sequence divergence could not be put into the tree, is located in  
 278 mitochondria<sup>36</sup>. **a** Phylogenetic distribution of TMEM70 homologs. **b** Cellular fractionation of cells expressing  
 279 TMEM186-TAP and TMEM223-TAP. Immunodetection against NDUFB11, as a marker of the mitochondrial  
 280 enriched fraction (M), Alpha-tubulin as a marker of the cytoplasm (C), and CBP. (T) stands for total fraction. **c**  
 281 and **d** Fluorescence microscopy images of cells expressing TMEM186-GFP (**c**) and TMEM223-GFP (**d**) stained  
 282 with Mitotracker (mitochondrial network) and DAPI (nucleus).

283

284

285 **Discussion**



286 Our results describe a role of TMEM70 in the assembly of CI and CV of the OXPHOS system. This finding is in  
287 line with previous studies of patients harbouring mutations in *TMEM70*, that did not always have an isolated CV  
288 deficiency but rather combined OXPHOS deficiencies or even an isolated CI deficiency<sup>18,20,22,28</sup>. The conclusions  
289 are supported by the results from BioID, complexome profiling analyses and enzyme measurements of the  
290 OXPHOS complexes. Although the assembly of both CI and CV are significantly affected in the absence of  
291 TMEM70, the effect on CV is more pronounced than on CI, which might explain the preponderance of CV  
292 phenotypes relative to CI phenotypes reported for patients with mutations in *TMEM70*.

293 In order to obtain a comprehensive list of potential interacting candidates that could hint at the function of  
294 TMEM70, we began by performing a biotin ligase proximity-dependent assay (BioID) of BirA\* tagged  
295 TMEM70, which indicated that the protein is in close contact with CI, CV and the small subunit of the  
296 mitochondrial ribosome. To determine a potential role of TMEM70 in the assembly of CI and CV in detail, we  
297 studied all the proteins of both complexes meticulously by complexome profiling<sup>30,31</sup>. Thus, we were able to  
298 detect the majority of the proteins of each complex and of their assembly intermediates. This allowed us to  
299 determine the effects that the lack of TMEM70 has on CI and CV assembly. For CI, the Q/P<sub>P-a</sub> and Q/P<sub>P</sub>  
300 intermediates accumulate in the absence of TMEM70, suggesting that the impairment in the pathway comes  
301 right after their assembly. In the case of Q/P<sub>P-a</sub>, and following one of the alternative assembly pathways  
302 (Supplementary Fig. S6), its accumulation could be caused by a reduction of forming the intermediate P<sub>P-b</sub>/P<sub>D-a</sub>.  
303 If we follow the other alternative assembly pathway (Fig. 2), intermediate Q/P<sub>P</sub> accumulation followed by Q/P  
304 depletion, suggests a problem with the incorporation of P<sub>D-a</sub> and P<sub>D-b</sub> intermediates, the latter of which also  
305 accumulates in the TMEM70 KO. The interaction between CI and TMEM70 is in line with a previous study by  
306 Guarini *et al.*<sup>37</sup>, who showed TMEM70 as a significant interactor of ECSIT and NDUFS5, both proteins  
307 belonging to the P<sub>P-b</sub>/P<sub>D-a</sub> intermediate and, in the case of ECSIT, also part of the Q/P<sub>P</sub> intermediate. The  
308 interaction of TMEM70 with proteins of the P<sub>P</sub> module<sup>37</sup>, the comigration with the distal part (P<sub>D</sub>) of CI<sup>6</sup>, and the  
309 accumulation of Q/P<sub>P-a</sub>, Q/P<sub>P</sub> and P<sub>D-b</sub> intermediates together with the depletion of P<sub>P-b</sub>/P<sub>D-a</sub> and Q/P  
310 intermediates, suggests that TMEM70 is involved in the assembly of the membrane arm (P-module) of CI by  
311 assisting in assembly or the stabilization of the P<sub>D-a</sub> intermediate. A role in the assembly or the stability of a  
312 membrane intermediate is consistent with the membrane architecture of the protein, consisting of two  
313 transmembrane helices followed by a long C-terminal tail<sup>22</sup>.

314 With respect to CV, we delineate a specific role of TMEM70 in its assembly. In the complexomics data we show  
315 how, upon lack of TMEM70, the intermediate where F<sub>1</sub> is bound to the membrane-embedded c-subunits



316 octamer<sup>34</sup> is completely absent. Despite the absence of the F<sub>1</sub>-c intermediate, there was still some CV being  
317 assembled, although at only 30% compared to the control. One possibility is that in TMEM70 depleted cells the  
318 assembly of the complex follows an alternative path that was already described by He *et al*<sup>38</sup>, where F<sub>1</sub> instead of  
319 being attached to the c-ring octamer first, instead attaches to the F<sub>0</sub> and the peripheral stalk before combining  
320 with the c-ring. Nevertheless, in our complexome profiling data we do not detect such an F<sub>1</sub>F<sub>0</sub> intermediate that  
321 would support this alternative path.

322 With respect to the small subunit of the mitochondrial ribosome, although we observed a slight but significant  
323 increment of mitochondrial ribosomes upon *TMEM70* knockout, we did not observe any detectable differences  
324 in its assembly nor in the efficiency of the translation of the mitochondrial products. Thus, as the synthesis of  
325 mitochondrial encoded subunits was not altered in *TMEM70* devoid cells, we find no evidence for the  
326 hypothesis of nucleoid disruption<sup>39</sup>. The interactions detected by the BioID experiment could be due to the  
327 structure of *TMEM70* and the addition of the BirA domain to its C-terminus. Such terminus protrudes into the  
328 mitochondrial matrix after the two transmembrane domains. This, together with the possibility of mitochondrial  
329 ribosomes being in close proximity to the inner membrane during the translation, could be the reason they were  
330 tagged.

331 Through our homology analyses and phylogenetic reconstruction of the co-evolution of *TMEM70/186/223*  
332 family with CI and CV we could not detect a *TMEM70* ortholog in *S. cerevisiae*, which is surprising as *S.*  
333 *cerevisiae* does have CV. Interestingly, it has been described how in this species, F<sub>1</sub> does not undergo the same  
334 assembly steps as in human and does not interact with the c-ring<sup>40</sup>. Furthermore, *S. cerevisiae* lacks CI, fitting  
335 our hypothesis of a double role of the protein in human, that is absent from *S. cerevisiae* because one of the  
336 target complexes has been lost in evolution (CI), and the manner in which the other target complex is assembled  
337 is different than in human. Sensitive homology detection does however reveal the presence of a *TMEM70*  
338 homolog in *S. cerevisiae*: *TMEM223*. *TMEM70*, *TMEM223* and the third member of this family that we could  
339 detect, *TMEM186*, appear widespread in eukaryotic evolution and only occur in species with OXPHOS  
340 complexes. We performed confocal microscopy for analysis of GFP-tagged *TMEM186* and *TMEM223*. The  
341 analysis showed the predominant localization of both proteins in the mitochondria, something that we could  
342 confirm by cell fractionation and isolation of mitochondria. Like *TMEM70*, *TMEM186* was also identified to  
343 co-migrate with CI assembly intermediates following dynamic complexome profiling<sup>6</sup>. Little is known about  
344 this protein; however, it was recently identified as an interaction partner of ECSIT<sup>37</sup>, suggesting a role in CI  
345 assembly. Additional studies are required to determine if this protein functions in CI assembly.

346 It is interesting and unusual that a single protein TMEM70 would be involved in the assembly of two different  
347 OXPHOS complexes, CI and CV. A common denominator based on our results is that, in both cases, it appears  
348 to recruit proteins to membrane intermediates during the assembly of the enzymes. Such a combination of  
349 hydrophobic and hydrophilic interactions would be consistent with the topology of the protein that contains two  
350 well conserved transmembrane helices together with a long (~100 amino acids) tail that protrudes into the  
351 matrix. Mrx15, the yeast homolog of TMEM70 and the ortholog of TMEM223, appears to tether the  
352 mitochondrial ribosome to the membrane during translation, using the hydrophilic C terminus to interact with the  
353 large subunit of the mitochondrial ribosome while the N terminus forms a hairpin in the inner mitochondrial  
354 membrane. We hypothesize that TMEM70 has a similar tethering role to in the assembly of complexes I and V.

355

## 356 **Materials and methods**

357

### 358 **Enzyme Measurements**

359 Respiratory chain enzyme analysis in HAP1 were performed as described before<sup>41</sup>. Values are expressed relative  
360 to the mitochondrial reference enzyme citrate synthase<sup>42</sup>.

361

### 362 **Cell culture**

363 HAP1 cells were grown in Iscove's Modified Dulbecco's Medium (IMDM) in the presence of 10% fetal calf  
364 serum and penicillin/ streptomycin.

365 HEK293 cells were cultured in DMEM (Biowhitaker) supplemented with 10% fetal calf serum (FCS) (v/v) and  
366 1% penicillin/streptomycin (GIBCO). Inducible cell lines were selected on 5 µg/ml blasticidin (Invitrogen) and  
367 200 µg/ml hygromycin (Calbiochem), and for expression of the transgene, 1 µg/ml doxycycline (Sigma Aldrich)  
368 was added for 24 hr.

369

### 370 **Knockout**

371 *TMEM70* knockout (HZGHC003615c010) was ordered at Horizon (Austria). A near-haploid human cell line  
372 (HAP1) was edited using CRISPR/Cas (Guide RNA sequence: CGGCTGGAGTACGGGGCCTT) resulting in a  
373 frameshift mutation of 32bp in exon 1<sup>26</sup>. This results in a 100% knockout. In Table 1 an overview of the  
374 knockout cell line is shown.

375

376 **Blue-Native, SDS-PAGE Analysis and complex I In Gel Activity Assay**

377 One-dimensional 10% sodium dodecyl sulfate-polyacrylamide gel electrophoresis (SDS-PAGE) and 4%–12%  
378 blue-native (BN)-PAGE was performed as described previously<sup>43</sup>. Lanes were loaded with 40 (SDS analysis) or  
379 80 (BN analysis)  $\mu$ g of solubilized mitochondrial protein. For the 1D and 2D BN SDS-PAGE followed by  
380 immunoblotting, mitoplasts were solubilized with n-dodecyl-  $\beta$ -D-maltoside, whereas for complexome profiling  
381 the solubilization was done with digitonin to preserve supercomplexes. After electrophoresis, gels were  
382 processed further for in-gel complex I activity assay, in-gel fluorescence detection, immunoblotting, or two-  
383 dimensional 10% SDS-PAGE or blotting, proteins were transferred to a PROTAN nitrocellulose membrane  
384 (Schleicher & Schuell).

385

386 **Antibodies and ECL detection**

387 Immunodetection was performed by the use of the following primary antibodies: CI-NDUFS3, CII-SDHA, CIII-  
388 core 2, CIV-COX4, CV-ATPase- $\alpha/\beta$  (gift from the Molecular Bioenergetics Group, Medical School, Goethe-  
389 University Frankfurt<sup>44</sup>), C3ORF60 (NDUFAF3) (Eurogentec) and V5 (Invitrogen). Goat-anti-rabbit and goat-  
390 anti-mouse IRDye CW 680 or IRDye CW 800 were used as secondary antibodies, to detect the proteins using the  
391 Odyssey system from LI-COR Biosciences. Secondary detection was performed using peroxidase-conjugated  
392 anti-mouse or anti-rabbit IgGs (Life Technologies). Immunoreactive bands were visualized using the enhanced  
393 chemiluminescence kit (Thermo Scientific) and detected using the Chemidoc XRS+ system (Biorad).

394

395 **Pulse labelling of mitochondrial translation products**

396 In vitro labelling of mitochondrial translation products was performed as described previously<sup>35</sup>. First, cells were  
397 incubated for 30 minutes with methionine, cysteine and glutamine free DMEM (Gibco) supplemented with  
398 glutamax (1Xconc), 10% dialyzed FBS and 1.1mg/l sodium pyruvate. Afterwards, emetine was added to a final  
399 concentration of 100 $\mu$ g/ml, after 5 minutes 200 $\mu$ Ci/ml <sup>35</sup>S methionine label was added during 1 hour. Cells were  
400 refreshed with 10% FBS DMEM media and harvested after 1h and after 5h of labelling and treated for SDS-  
401 PAGE or BN-PAGE.

402

403 **Generation of inducible cell lines**

404 *TMEM70* was cloned into pDONR201 as described<sup>45</sup>. The complete open reading frame (without stop codon)  
405 was created by PCR according to the manufacturer's protocol and cloned into pDONR201 by the Gateway BP

406 Clonase II Enzyme Mix. The pDONR201-TMEM70 was recombined with the pDEST5-BirA\*-FLAG-C-ter  
407 using the LR Clonase II Enzyme Mix (Invitrogen). Flp-In T-Rex HEK293 cells were grown in DMEM  
408 supplemented with 10% FBS and 1% pen/strep (100 U/ml). One day before transfection Pen/strep is removed.  
409 When reached 60-80% confluence cells were transfected with each of the constructs with pOG44 using  
410 Superfect. Cells were refreshed 3h after transfection. After 48h cells were selected by the addition of  
411 hygromycin and Blasticidin (Invitrogen). Clones were selected and when reaching 60-80% confluency, protein  
412 expression was induced by using 1 µg/ml doxycycline (Sigma Aldrich) for 24h and checked by Western blot  
413 analysis.

414

#### 415 **Biotin ligase proximity assay (BioID)**

416 Doxycycline 1 µg/ml (Sigma Aldrich) was added to Flp-In T-Rex HEK293 cells to induce the expression of the  
417 construct. After 24h the cells were washed with PBS 1X twice and placed in complete medium for 3h.  
418 Afterwards, a final concentration of 50 µM of biotin was added to the cells to start the biotinylation process <sup>46</sup>.  
419 After 24h cells were washed, collected and lysed in lysis buffer (50 mM Tris-HCl pH7.4, 500 mM NaCl, 0.4%  
420 SDS, 1 mM DTT and 1x Protease inhibitor) with 2% TX100 and then sonicated twice. Pre-chilled 50 mM Tris-  
421 HCl pH7.8 was added before the third sonication and then all samples were collected at 16.500g for 10 minutes  
422 at 4 °C. Supernatant was added to the pre-equilibrated dynabeads and it was incubated overnight in the rotator.  
423 Next day, beads were collected in the magnetic separation stand and the supernatant was removed. Beads were  
424 washed 4 times with 4 different washing buffers (Wash buffer 1: 2% SDS. Wash buffer 2: 0.1% (w/v)  
425 deoxycholic acid, 1 % TX100, 1 mM EDTA, 500 mM NaCl, 50 mM HEPES pH 7,4. Wash buffer 3: 0.5 % (w/v)  
426 deoxycholic acid, 0.5 % (w/v) NP-40 (Igepal), 1 mM EDTA, 250 mM LiCl, 10 mM Tris-HCl pH7.8) for 8  
427 minutes in the rotator. After the washing 50 µl 50mM ABC / 8M Urea was added to the beads and resuspended  
428 gently by pipetting, then the sample was snap frozen in LN2 and stored at -80 degrees.

429 To prepare the beads first we added 1 µl of reduction buffer (10mM DTT) for 30' at RT, then 1 µl alkylation  
430 buffer (50 mM chloroacetamide in 50mM ABC) and incubated for 20' at room temperature (light protected).  
431 Afterwards 1µg of LysC was added and incubated for at least 3 hours at room temperature. Subsequently the  
432 sample was diluted in 50mM ABC and 1ul of trypsin was incorporated for digestion overnight at 37 degrees on a  
433 thermomixer on continuous agitation at 700 rpm. The supernatant containing the peptides was transferred to a  
434 new Eppendorf tube and TFA was added to a final concentration of 2%. All samples were incorporated into  
435 STAGE TIPS that were previously washed, once all sample has pass the filter 50 µl of buffer A (0.1% formic

436 acid in HPLC water) was added and centrifuged. Then 40  $\mu$ l of buffer B (80% ACN and 0.1% formic acid in  
437 HPLC water) was added and the eluate was collected in 0.5 ml reaction vials. All samples were concentrated and  
438 dried. Afterwards, 25  $\mu$ l of buffer A was added and sonicated 2' in water bath before using the detergent removal  
439 kit. Measurements were performed by nanoLC 1000 (Thermo Scientific) chromatography coupled online to Q  
440 Exactive hybrid quadrupole-Orbitrap mass spectrometer (Thermo Scientific). Chromatography was performed  
441 with an Acclaim PepMap 0.3 x 5 mm 5 $\mu$ m 100 $\text{\AA}$  trap column (Thermo scientific) in combination with a 15cm  
442 long x 100 $\mu$ m ID fused silica electrospray emitter (New Objective, PicoTip Emitter, FS360-100-8-N-5-C15)  
443 packed in-house with ReproSil-Pur C18-AQ 3  $\mu$ m 140 $\text{\AA}$  resin (Dr. Maisch)<sup>47</sup>. Tryptic peptides were loaded and  
444 analysed by liquid chromatography tandem mass spectrometry (LC-MS/MS) as previously explained. Raw data  
445 files provided by MaxQuant (version 1.5.0.25; [www.maxquant.org](http://www.maxquant.org)) were further analysed taking the log10 value  
446 of their iBAQ and comparing experiment values (with doxycycline and biotin) with control ones (without  
447 doxycycline and with biotin and vice versa). Proteins with a significant increase in their iBAQ values (Wilcoxon  
448 rank-sum test, FDR 0.05) with respect to their own control runs, were considered as potential interacting  
449 candidates.

450

#### 451 **Complexome profiling**

452 Complexome profiling was performed essentially as described previously<sup>6,31</sup>, except for the chymotrypsin  
453 complexomics data, where chymotrypsin was used instead of trypsin and, from the 60 slices, 20 (slices 30 to 50)  
454 where further processed.

455 BN- PAGE gel lanes of mitochondrial enriched fraction of *TMEM70* KO and controls were incubated in fixing  
456 solution (50% methanol, 10% acetic acid, 10 mM ammonium acetate [pH 3]) for 60 minutes, washed twice for  
457 30 minutes with ultrapure water, cut in 60 even slices and transferred into a 96-well plate (Millipore  
458 MABVN1250) containing 150 $\mu$ l of destaining solution (50% methanol, 50 mM ammonium hydrogen carbonate,  
459 AHC). Then all the slices were washed three times for 30 minutes under gentle agitation at room temperature  
460 with the same solution (AHC) to remove the excess of dye. Afterwards by centrifugation (600 x g, 3min, RT) the  
461 excess of solution was removed and in-gel tryptic digest of the gel slices was performed as described before<sup>6,31</sup>.  
462 Gel slices were incubated with 120  $\mu$ l of 5mM dithiothreitol for 60 minutes which afterwards was removed by  
463 centrifugation, and then 120 $\mu$ l of 15mM chloroacetamide were added to each well and also removed after 45  
464 minutes of incubation. After drying the gel pieces for 45 minutes at room temperature the gel slices were  
465 rehydrated in 20 $\mu$ l of trypsin solution or chymotrypsin (5 ng/ $\mu$ L in 50 mM AHC and 1 mM CaCl<sub>2</sub>) for 30 min

466 at 4°C. Alternatively, chymotrypsin was used in an independent replicate. After addition of 150µl of 50mM  
467 AHC solution the gel pieces were incubated overnight at 37°C. The supernatant, containing the peptides was  
468 collected by centrifugation (600 x g, 3min, RT) into a new 96-well plate. The column was washed subsequently  
469 with 80% acetonitrile and re-equilibrated with 5% acetonitrile for 5 minutes once by adding elution solution  
470 (30% acetonitrile, 3% formic acid) for 20 minutes and transferred to a sterile (unfiltered) 96-well plate. The  
471 supernatant was dried using a SpeedVac concentrator, remaining peptides were additionally extracted in 20 µl of  
472 5% acetonitrile/0.5% formic acid.

473 Tryptic peptides were analysed by liquid chromatography tandem mass spectrometry (LC-MS/MS) in a Q-  
474 Exactive Orbitrap Mass Spectrometry System equipped with a nano-flow high-performance liquid  
475 chromatography system EASY-nLC 1000 at the front end and the Thermo Scientific Xcalibur 2.2 SP1 Software  
476 Package. Peptide separation was performed on a PicoTip emitter column filled with 3 mm C18 beads (Dr Maisch  
477 GmbH, Germany) using 30 min linear gradients of 5 to 35% acetonitrile with 0.1% formic acid. The mass  
478 spectrometer was operated in a Top 20 dependent, positive ion mode switching automatically between MS and  
479 MS/MS. Full scan MS mode (400 to 1400 m/z) was operated at a resolution of 70 000 with automatic gain  
480 control (AGC) target of  $1 \times 10^6$  ions and a maximum ion transfer of 20 ms. Selected ions for MS/MS were  
481 analysed using the following parameters: resolution 17500; AGC target of  $1 \times 10^5$ ; maximum ion transfer of 50  
482 ms; 4.0 m/z isolation window; for CID a normalized collision energy 30% was used; and dynamic exclusion of  
483 30.0 s. A lock mass ion (m/z=445.12) was used for internal calibration<sup>48</sup>.

484 All raw files were analyzed by MaxQuant software (version 1.5.0.25; [www.maxquant.org](http://www.maxquant.org)). Spectra were  
485 searched against the *H. sapiens* NCBI RefSeq database with additional sequences of known contaminants and  
486 reverse decoy with a strict FDR of 0.01. Database searches were done with 20 ppm and 0.5 Da mass tolerances  
487 for precursor ions and fragmented ions, respectively. Trypsin was selected as the protease with two missed  
488 cleavages allowed. Dynamic modifications included N-terminal acetylation and oxidation of methionine.  
489 Cysteine carbamidomethylation was set as fixed modification. For protein quantification, unique plus razor  
490 peptides were considered.

491

#### 492 **Normalization and alignment of complexome profiles**

493 After analysis in Maxquant, the complexome profiles were normalised to correct for varying intensities. Profiles  
494 were corrected so that the sum of intensities of proteins annotated as mitochondrial in MitoCarta 2.0<sup>32</sup> are equal  
495 between samples. After normalisation, the profiles were aligned in silico with COPAL<sup>33</sup> to correct for technical

496 variation caused by shifts in protein migration across the gel. Gaps introduced in the alignment were filled by  
497 linear interpolation based on its adjacent values.

498

#### 499 **Quantification of fully assembled complexes and intermediates**

500 Normalized iBAQ values were taken from the profiles after aligning them with COPAL<sup>33</sup> (Supplementary Table  
501 S4). In the case of fully assembled complexes, subunits belonging to CI (NDUFB3, NDUFC2, NDUFB1,  
502 NDUFA5, NDUFA6, NDUFS4, NDUFB10, NDUFB2, NDUFB5, NDUFS1, NDUFS8, NDUFAB1, NDUFA2,  
503 NDUFS2, NDUFS3, NDUFB6, NDUFB4, NDUFB8, NDUFA7, NDUFB7, NDUFV1, NDUFA8, NDUFV3,  
504 NDUFA3, NDUFC1, NDUFS5, NDUFA1, NDUFS6, NDUFV2, NDUFS7, NDUFA11, NDUFA9, NDUFB11,  
505 NDUFA13, NDUFA12, NDUFB9, ND1, ND2, ND3, ND4, ND5, ND6), CII (SDHA, SDHB, SDHC, SDHD),  
506 CIII (CYTB, UQCRQ, UQCR11, UQCRH, UQCRB, UQCRC2, UQCRC1, UQCRFS1, CYC1, UQCR10), CIV  
507 (COX6C, COX3, COX2, COX5B, COX4I1, COX6B1, COX7C, COX5A, COX7B, COX7A2, COX8A, COX1),  
508 CV (ATP8, ATP6, ATP5G1, ATP5H, ATP5L, ATP5J, ATP5D, ATP5O, ATP5J2, C14orf2, ATP5I, ATP5F1,  
509 ATP5C1, USMG5, ATPIF1, ATP5A1, ATP5B) were considered. With respect to CI intermediates, subunits  
510 belonging to all the previously described intermediates of CI assembly<sup>6</sup>, namely, Q/P<sub>P-a</sub> (NDUFA5, NDUFS2,  
511 NDUFS3, NDUFS7, NDUFS8, NDUFAF4, NDUFAF3, TIMMDC1, ND1, NDUFA3, NDUFA8, NDUFA13),  
512 P<sub>P-b</sub> (NDUFA5, NDUFS2, NDUFS3, NDUFS7, NDUFS8, NDUFAF4, NDUFAF3, TIMMDC1, ND1,  
513 NDUFA3, NDUFA8, NDUFA13), P<sub>D-a</sub> (NDUFB6, NDUFB5, NDUFB10, NDUFB11, NDUFB1, ND4,  
514 FOXRED1, ATP5SL), P<sub>D-b</sub> (NDUFAB1, NDUFB7, NDUFB3, NDUFB8, ND5, NDUFB9, NDUFB2), Q/P<sub>P</sub>  
515 (NDUFA5, NDUFS2, NDUFS3, NDUFS7, NDUFS8, NDUFAF4, NDUFAF3, TIMMDC1, ND1, NDUFA3,  
516 NDUFA8, NDUFA13, NDUFAF2, NDUFA9, NDUFA1), P<sub>P-b</sub>/P<sub>D-a</sub> (NDUFS5, NDUFB6, NDUFB5,  
517 NDUFB10, NDUFB11, NDUFB1, ND4, FOXRED1, ATP5SL, NDUFB4) and Q/P (NDUFA5, NDUFS2,  
518 NDUFS3, NDUFS7, NDUFS8, NDUFAF4, NDUFAF3, TIMMDC1, ND1, NDUFA3, NDUFA8, NDUFA13,  
519 NDUFAF2, NDUFA9, NDUFA1, NDUFB6, NDUFB5, NDUFB10, NDUFB11, NDUFB1, ND4, FOXRED1,  
520 ATP5SL, NDUFAB1, NDUFB7, NDUFB3, NDUFB8, ND5, NDUFB9, NDUFB2, NDUFS5) were considered.  
521 Regarding CV intermediates, subunits belonging to intermediates described in Supplementary Fig. S7 were  
522 considered. Those are F<sub>1</sub> and F<sub>1-c</sub> (ATP5A1, ATP5B, ATP5C1, ATP5D), F<sub>O</sub> early (ATP5F1, ATP5I, ATP5J2,  
523 ATP5L) and F<sub>O</sub> late (ATP6, ATP8, C14orf2, USMG5, ATP5H, ATP5J, ATP5O, ATP5F1, ATP5I, ATP5J2,  
524 ATP5L). For each subunit, we considered and averaged all three values from the peak matching the mass of the  
525 complex and its flanking values. Then, we averaged them per condition, finally obtaining one value per subunit.



526 We compared these values between control and KO conditions in a paired manner per subunit using a non-  
527 parametric test (Wilcoxon rank-sum test). For intermediates Q/P<sub>P</sub> and P<sub>P</sub>-b/P<sub>D</sub>-a, given their partial overlap due  
528 to their similar mass, we selected subunits that are not shared between them in order to be able to measure their  
529 behaviour independently.

530

### 531 **Microscopy**

532 For confocal imaging, HEK293 cells expressing inducible NDUFAF3-GFP were cultured in a Wilco dish  
533 (Intracel, Royston, UK), washed with phosphate-buffered saline (PBS), and incubated with 1  $\mu$ M Mitotracker  
534 Red (Invitrogen) for 15 min and with 10  $\mu$ M Hoechst 3342 (Invitrogen) for 30 min, both at 37°C. Before  
535 imaging, the culture medium was replaced by a colorless HEPES-Tris (HT) solution (132 mM NaCl, 4.2 mM  
536 KCl, 1 mM CaCl<sub>2</sub>, 1 mM MgCl<sub>2</sub>, 5.5 mM D-glucose, and 10 mM HEPES, pH 7.4) and fluorescence images were  
537 taken on a ZEISS LSM510 Meta confocal microscope (Carl Zeiss). Images were acquired at a rate of 10 Hz with  
538 the use of a  $\times$ 63 oil-immersion objective (N.A. 1.4; Carl Zeiss). Zoom factor 2 and pinhole settings were selected  
539 for the attainment of an optical section thickness of < 1  $\mu$ m. Measurements were performed at 20°C in the dark.  
540 Confocal images of GFP and MitoTracker Red fluorescence were simultaneously collected with the use of an  
541 argon laser (laser power 1%) with a 488 nm dichroic mirror and a 500–530 nm band-pass barrier filter in  
542 combination with a helium-neon (HeNe) 1 laser (laser power 43%) with a 543 nm dichroic mirror and a 560 nm  
543 long-pass filter. With the multitrack setting used, Hoechst fluorescence was subsequently imaged with the use of  
544 a 405 nm diode laser (laser power 10%) and a 420–480 band-pass barrier filter.

545

### 546 **Phylogenetic reconstruction of TMEM70 family**

547 Protein sequences were manually selected from search results obtained with the jackhmmer tool from HMMER<sup>49</sup>  
548 version 3.1b2. We initiated the search with TMEM70, TMEM186 or TMEM223 and searched against the  
549 UniProtKB database, iterating until getting back all three human paralogs (6, 6 and 5 iterations, respectively). In  
550 none of the cases did we retrieve other human proteins than TMEM70, TMEM186 or TMEM223. In order to  
551 obtain as many sequences from different phyla as possible, we repeated the strategy using the PSI-BLAST  
552 algorithm from BLAST<sup>50</sup> searching against the refseq protein database. After selecting the sequences, we aligned  
553 them with MAFFT<sup>51</sup> v7.306 using the L-INS-I algorithm with the “Leave gappy regions” and “Mafft-homologs:  
554 ON” parameters set. The obtained alignment was manually refined by deleting large gaps caused by apparent  
555 insertions in only few aligned sequences. Finally, in order to unravel the orthologous groups, we reconstructed



556 the phylogenetic tree with PhyML<sup>52</sup> version 20120412 and its automatic model selection SMS<sup>53</sup> using Bayesian  
557 Information Criterion. The resulting tree was plotted with iTOL<sup>54</sup> version 3.5.4.

558

### 559 **Co-evolution screen for TMEM70**

560 We employed an in-house orthology database containing 52 diverse eukaryotic species to derive phylogenetic  
561 profiles for all human proteins as previously described by van Dam *et al.*<sup>55</sup>. Shortly, we collected high quality  
562 proteomes from genome databases and calculated orthologous groups using OrthoMCL (v2.0)<sup>56</sup>. Phylogenetic  
563 profiles were computed for each human protein based on the orthologous group they were mapped to. Proteins  
564 mapped to the same orthologous group obtained identical profiles. Each profile is a vector of 0's and 1's  
565 reflecting the presence of an orthologous group member in a particular species. These profiles, and a species tree  
566 for all 52 species as created before<sup>55</sup> were used as input for the Perl script to derive the differential Dollo  
567 parsimony score as previously used by Kensche *et al.*<sup>57</sup>.

568

### 569 **Acknowledgements**

570 Funded by the European Commission (FP7-PEOPLE-ITN. GA. 317433). U.B. and S.G.-C. were supported by a  
571 grant from the Excellence Initiative of the German Federal and State Governments (EXC 115). M.A.H., U.B.  
572 and J.S. were supported by a TOP grant from the Netherlands Organization for Health Research and  
573 Development (no. 91217009). Part of this work was financed by a grant obtained from the United Mitochondrial  
574 Disease Foundation (UMDF).

575

### 576 **Author contributions**

577 L.S.-C. and L.G.J.N. conceived the study and designed the research. L.S.-C., M.B. and F.B. performed the  
578 experiments and generated the data with help from S.G.-C. and R.R. J.S. aligned the complexomics data. D.M.E.  
579 analysed the data. D.M.E. and M.A.H. performed the phylogenetic reconstruction and T.J.P.D. and M.A.H.,  
580 performed the coevolution analysis. L.S.-C., D.M.E., M.A.H. and L.G.J.N. wrote the manuscript and S.G.-C.,  
581 J.S., T.J.P.D. R.R. and U.B. discussed the results and helped with the manuscript.

582

### 583 **Competing interests**

584 The authors declare no competing interests.

585

586 **References**

- 587 1 Alston, C. L., Rocha, M. C., Lax, N. Z., Turnbull, D. M. & Taylor, R. W. The genetics and  
588 pathology of mitochondrial disease. *J Pathol* **241**, 236-250, doi:10.1002/path.4809 (2017).
- 589 2 Mitchell, P. Coupling of phosphorylation to electron and hydrogen transfer by a chemi-  
590 osmotic type of mechanism. *Nature* **191**, 144-148 (1961).
- 591 3 Zhu, J., Vinothkumar, K. R. & Hirst, J. Structure of mammalian respiratory complex I. *Nature*  
592 **536**, 354-358, doi:10.1038/nature19095 (2016).
- 593 4 Brandt, U. Energy converting NADH:quinone oxidoreductase (complex I). *Annu Rev Biochem*  
594 **75**, 69-92, doi:10.1146/annurev.biochem.75.103004.142539 (2006).
- 595 5 Sanchez-Caballero, L., Guerrero-Castillo, S. & Nijtmans, L. Unraveling the complexity of  
596 mitochondrial complex I assembly: A dynamic process. *Biochim Biophys Acta* **1857**, 980-990,  
597 doi:10.1016/j.bbabbio.2016.03.031 (2016).
- 598 6 Guerrero-Castillo, S. *et al.* The Assembly Pathway of Mitochondrial Respiratory Chain  
599 Complex I. *Cell Metab* **25**, 128-139, doi:10.1016/j.cmet.2016.09.002 (2017).
- 600 7 Pedersen, P. L. & Amzel, L. M. ATP synthases. Structure, reaction center, mechanism, and  
601 regulation of one of nature's most unique machines. *J Biol Chem* **268**, 9937-9940 (1993).
- 602 8 Walker, J. E. The ATP synthase: the understood, the uncertain and the unknown. *Biochem*  
603 *Soc Trans* **41**, 1-16, doi:10.1042/BST20110773 (2013).
- 604 9 Ghezzi, D. & Zeviani, M. Human diseases associated with defects in assembly of OXPHOS  
605 complexes. *Essays Biochem* **62**, 271-286, doi:10.1042/EBC20170099 (2018).
- 606 10 Elurbe, D. M. & Huynen, M. A. The origin of the supernumerary subunits and assembly  
607 factors of complex I: A treasure trove of pathway evolution. *Biochim Biophys Acta* **1857**, 971-  
608 979, doi:10.1016/j.bbabbio.2016.03.027 (2016).
- 609 11 Huynen, M. A., de Hollander, M. & Szklarczyk, R. Mitochondrial proteome evolution and  
610 genetic disease. *Biochim Biophys Acta* **1792**, 1122-1129, doi:10.1016/j.bbadis.2009.03.005  
611 (2009).

- 612 12 Bych, K. *et al.* The iron-sulphur protein Ind1 is required for effective complex I assembly.  
613 *EMBO J* **27**, 1736-1746, doi:10.1038/emboj.2008.98 (2008).
- 614 13 Pickova, A., Paul, J., Petruzzella, V. & Houstek, J. Differential expression of ATPAF1 and  
615 ATPAF2 genes encoding F(1)-ATPase assembly proteins in mouse tissues. *FEBS Lett* **551**, 42-  
616 46 (2003).
- 617 14 Cizkova, A. *et al.* TMEM70 mutations cause isolated ATP synthase deficiency and neonatal  
618 mitochondrial encephalomyopathy. *Nat Genet* **40**, 1288-1290, doi:10.1038/ng.246  
619 (2008).
- 620 15 Calvo, S. *et al.* Systematic identification of human mitochondrial disease genes through  
621 integrative genomics. *Nat Genet* **38**, 576-582, doi:10.1038/ng1776 (2006).
- 622 16 Hejzlarova, K. *et al.* Expression and processing of the TMEM70 protein. *Biochim Biophys Acta*  
623 **1807**, 144-149, doi:10.1016/j.bbabi.2010.10.005 (2011).
- 624 17 Kratochvilova, H. *et al.* Mitochondrial membrane assembly of TMEM70 protein.  
625 *Mitochondrion* **15**, 1-9, doi:10.1016/j.mito.2014.02.010 (2014).
- 626 18 Wortmann, S. B. *et al.* Biochemical and genetic analysis of 3-methylglutaconic aciduria type  
627 IV: a diagnostic strategy. *Brain* **132**, 136-146, doi:10.1093/brain/awn296 (2009).
- 628 19 Catteruccia, M. *et al.* Persistent pulmonary arterial hypertension in the newborn (PPHN): a  
629 frequent manifestation of TMEM70 defective patients. *Mol Genet Metab* **111**, 353-359,  
630 doi:10.1016/j.ymgme.2014.01.001 (2014).
- 631 20 Diodato, D. *et al.* Common and Novel TMEM70 Mutations in a Cohort of Italian Patients with  
632 Mitochondrial Encephalomyopathy. *JIMD Rep* **15**, 71-78, doi:10.1007/8904\_2014\_300  
633 (2015).
- 634 21 Honzik, T. *et al.* Mitochondrial encephalomyopathy with early neonatal onset due to  
635 TMEM70 mutation. *Arch Dis Child* **95**, 296-301, doi:10.1136/adc.2009.168096 (2010).

- 636 22 Jonckheere, A. I. *et al.* Restoration of complex V deficiency caused by a novel deletion in the  
637 human TMEM70 gene normalizes mitochondrial morphology. *Mitochondrion* **11**, 954-963,  
638 doi:10.1016/j.mito.2011.08.012 (2011).
- 639 23 Magner, M. *et al.* TMEM70 deficiency: long-term outcome of 48 patients. *J Inherit Metab Dis*  
640 **38**, 417-426, doi:10.1007/s10545-014-9774-8 (2015).
- 641 24 Shchelochkov, O. A. *et al.* Milder clinical course of Type IV 3-methylglutaconic aciduria due to  
642 a novel mutation in TMEM70. *Mol Genet Metab* **101**, 282-285,  
643 doi:10.1016/j.ymgme.2010.07.012 (2010).
- 644 25 Spiegel, R. *et al.* TMEM70 mutations are a common cause of nuclear encoded ATP synthase  
645 assembly defect: further delineation of a new syndrome. *J Med Genet* **48**, 177-182,  
646 doi:10.1136/jmg.2010.084608 (2011).
- 647 26 Torraco, A. *et al.* TMEM70: a mutational hot spot in nuclear ATP synthase deficiency with a  
648 pivotal role in complex V biogenesis. *Neurogenetics* **13**, 375-386, doi:10.1007/s10048-012-  
649 0343-8 (2012).
- 650 27 Houstek, J., Kmoch, S. & Zeman, J. TMEM70 protein - a novel ancillary factor of mammalian  
651 ATP synthase. *Biochim Biophys Acta* **1787**, 529-532, doi:10.1016/j.bbabi.2008.11.013  
652 (2009).
- 653 28 Braczynski, A. K. *et al.* ATP synthase deficiency due to TMEM70 mutation leads to  
654 ultrastructural mitochondrial degeneration and is amenable to treatment. *BioMed research*  
655 *international* **2015**, 462592, doi:10.1155/2015/462592 (2015).
- 656 29 Huang da, W., Sherman, B. T. & Lempicki, R. A. Systematic and integrative analysis of large  
657 gene lists using DAVID bioinformatics resources. *Nat Protoc* **4**, 44-57,  
658 doi:10.1038/nprot.2008.211 (2009).
- 659 30 Wessels, H. J. *et al.* LC-MS/MS as an alternative for SDS-PAGE in blue native analysis of  
660 protein complexes. *Proteomics* **9**, 4221-4228 (2009).

- 661 31 Heide, H. *et al.* Complexome profiling identifies TMEM126B as a component of the  
662 mitochondrial complex I assembly complex. *Cell Metab* **16**, 538-549,  
663 doi:10.1016/j.cmet.2012.08.009 (2012).
- 664 32 Calvo, S. E., Clauser, K. R. & Mootha, V. K. MitoCarta2.0: an updated inventory of mammalian  
665 mitochondrial proteins. *Nucleic Acids Res* **44**, D1251-1257, doi:10.1093/nar/gkv1003 (2016).
- 666 33 Van Strien, J. *et al.* COmplexome Profiling ALignment (COPAL) reveals remodeling of  
667 mitochondrial protein complexes in Barth syndrome. *Bioinformatics*,  
668 doi:10.1093/bioinformatics/btz025 (2019).
- 669 34 Nijtmans, L. G., Klement, P., Houstek, J. & van den Bogert, C. Assembly of mitochondrial ATP  
670 synthase in cultured human cells: implications for mitochondrial diseases. *Biochim Biophys*  
671 *Acta* **1272**, 190-198 (1995).
- 672 35 Boulet, L., Karpati, G. & Shoubridge, E. A. Distribution and threshold expression of the  
673 tRNA(Lys) mutation in skeletal muscle of patients with myoclonic epilepsy and ragged-red  
674 fibers (MERRF). *Am J Hum Genet* **51**, 1187-1200 (1992).
- 675 36 Moller-Hergt, B. V., Carlstrom, A., Stephan, K., Imhof, A. & Ott, M. The ribosome receptors  
676 Mrx15 and Mba1 jointly organize cotranslational insertion and protein biogenesis in  
677 mitochondria. *Mol Biol Cell* **29**, 2386-2396, doi:10.1091/mbc.E18-04-0227 (2018).
- 678 37 Guarani, V. *et al.* TIMMDC1/C3orf1 functions as a membrane-embedded mitochondrial  
679 complex I assembly factor through association with the MCIA complex. *Molecular and*  
680 *cellular biology* **34**, 847-861, doi:10.1128/MCB.01551-13 (2014).
- 681 38 He, J. *et al.* Assembly of the membrane domain of ATP synthase in human mitochondria. *Proc*  
682 *Natl Acad Sci U S A* **115**, 2988-2993, doi:10.1073/pnas.1722086115 (2018).
- 683 39 Cameron, J. M. *et al.* Complex V TMEM70 deficiency results in mitochondrial nucleoid  
684 disorganization. *Mitochondrion* **11**, 191-199, doi:10.1016/j.mito.2010.09.008 (2011).
- 685 40 Song, J., Pfanner, N. & Becker, T. Assembling the mitochondrial ATP synthase. *Proc Natl Acad*  
686 *Sci U S A* **115**, 2850-2852, doi:10.1073/pnas.1801697115 (2018).

- 687 41 Janssen, A. J. *et al.* Spectrophotometric assay for complex I of the respiratory chain in tissue  
688 samples and cultured fibroblasts. *Clin Chem* **53**, 729-734, doi:10.1373/clinchem.2006.078873  
689 (2007).
- 690 42 Srere, P. A. The citrate cleavage enzyme. I. Distribution and purification. *J Biol Chem* **234**,  
691 2544-2547 (1959).
- 692 43 Calvaruso, M. A., Smeitink, J. & Nijtmans, L. Electrophoresis techniques to investigate defects  
693 in oxidative phosphorylation. *Methods* **46**, 281-287, doi:10.1016/j.ymeth.2008.09.023  
694 (2008).
- 695 44 Wittig, I., Velours, J., Stuart, R. & Schagger, H. Characterization of domain interfaces in  
696 monomeric and dimeric ATP synthase. *Mol Cell Proteomics* **7**, 995-1004,  
697 doi:10.1074/mcp.M700465-MCP200 (2008).
- 698 45 Vogel, R. O. *et al.* Cytosolic signaling protein Ecsit also localizes to mitochondria where it  
699 interacts with chaperone NDUFAF1 and functions in complex I assembly. *Genes Dev* **21**, 615-  
700 624, doi:10.1101/gad.408407 (2007).
- 701 46 Firat-Karalar, E. N. & Stearns, T. Probing mammalian centrosome structure using BioID  
702 proximity-dependent biotinylation. *Methods Cell Biol* **129**, 153-170,  
703 doi:10.1016/bs.mcb.2015.03.016 (2015).
- 704 47 Ishihama, Y., Rappsilber, J., Andersen, J. S. & Mann, M. Microcolumns with self-assembled  
705 particle frits for proteomics. *J Chromatogr A* **979**, 233-239 (2002).
- 706 48 Olsen, J. V. *et al.* Parts per million mass accuracy on an Orbitrap mass spectrometer via lock  
707 mass injection into a C-trap. *Mol Cell Proteomics* **4**, 2010-2021, doi:10.1074/mcp.T500030-  
708 MCP200 (2005).
- 709 49 Finn, R. D. *et al.* HMMER web server: 2015 update. *Nucleic Acids Res* **43**, W30-38,  
710 doi:10.1093/nar/gkv397 (2015).
- 711 50 Altschul, S. F. *et al.* Gapped BLAST and PSI-BLAST: a new generation of protein database  
712 search programs. *Nucleic Acids Res* **25**, 3389-3402 (1997).

- 713 51 Katoh, K. & Standley, D. M. MAFFT multiple sequence alignment software version 7:  
714 improvements in performance and usability. *Mol Biol Evol* **30**, 772-780,  
715 doi:10.1093/molbev/mst010 (2013).
- 716 52 Guindon, S. *et al.* New algorithms and methods to estimate maximum-likelihood  
717 phylogenies: assessing the performance of PhyML 3.0. *Syst Biol* **59**, 307-321,  
718 doi:10.1093/sysbio/syq010 (2010).
- 719 53 Lefort, V., Longueville, J. E. & Gascuel, O. SMS: Smart Model Selection in PhyML. *Mol Biol Evol*  
720 **34**, 2422-2424, doi:10.1093/molbev/msx149 (2017).
- 721 54 Letunic, I. & Bork, P. Interactive tree of life (iTOL) v3: an online tool for the display and  
722 annotation of phylogenetic and other trees. *Nucleic Acids Res* **44**, W242-245,  
723 doi:10.1093/nar/gkw290 (2016).
- 724 55 van Dam, T. J. *et al.* Evolution of modular intraflagellar transport from a coatomer-like  
725 progenitor. *Proc. Natl. Acad. Sci. U. S. A.* **110**, 6943-6948, doi:10.1073/pnas.1221011110  
726 (2013).
- 727 56 Li, L., Stoeckert, C. J., Jr. & Roos, D. S. OrthoMCL: identification of ortholog groups for  
728 eukaryotic genomes. *Genome Res.* **13**, 2178-2189, doi:10.1101/gr.1224503 (2003).
- 729 57 Kensche, P. R., van Noort, V., Dutilh, B. E. & Huynen, M. A. Practical and theoretical advances  
730 in predicting the function of a protein by its phylogenetic distribution. *J R Soc Interface* **5**,  
731 151-170, doi:10.1098/rsif.2007.1047 (2008).
- 732 58 Nikolovski, N. *et al.* Putative glycosyltransferases and other plant Golgi apparatus proteins  
733 are revealed by LOPIT proteomics. *Plant Physiol* **160**, 1037-1051, doi:10.1104/pp.112.204263  
734 (2012).
- 735 59 Matsuyama, A. *et al.* ORFeome cloning and global analysis of protein localization in the  
736 fission yeast *Schizosaccharomyces pombe*. *Nat Biotechnol* **24**, 841-847, doi:10.1038/nbt1222  
737 (2006).

738

739

740
